# Supplementary material
Source: PubMed Central journal article supplement (PMC4213636)

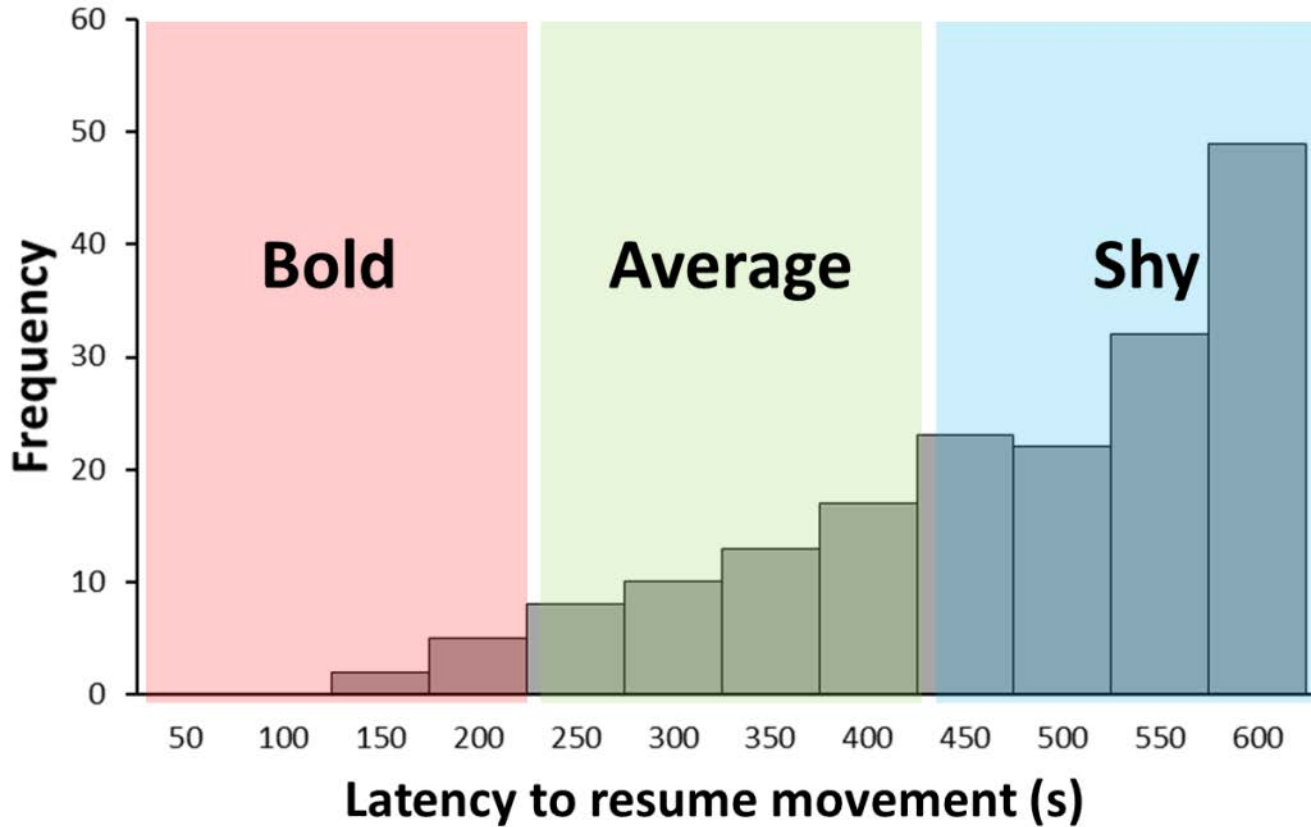

Supplement: rspb20141424supp1.pdf [file rspb20141424supp1.pdf]

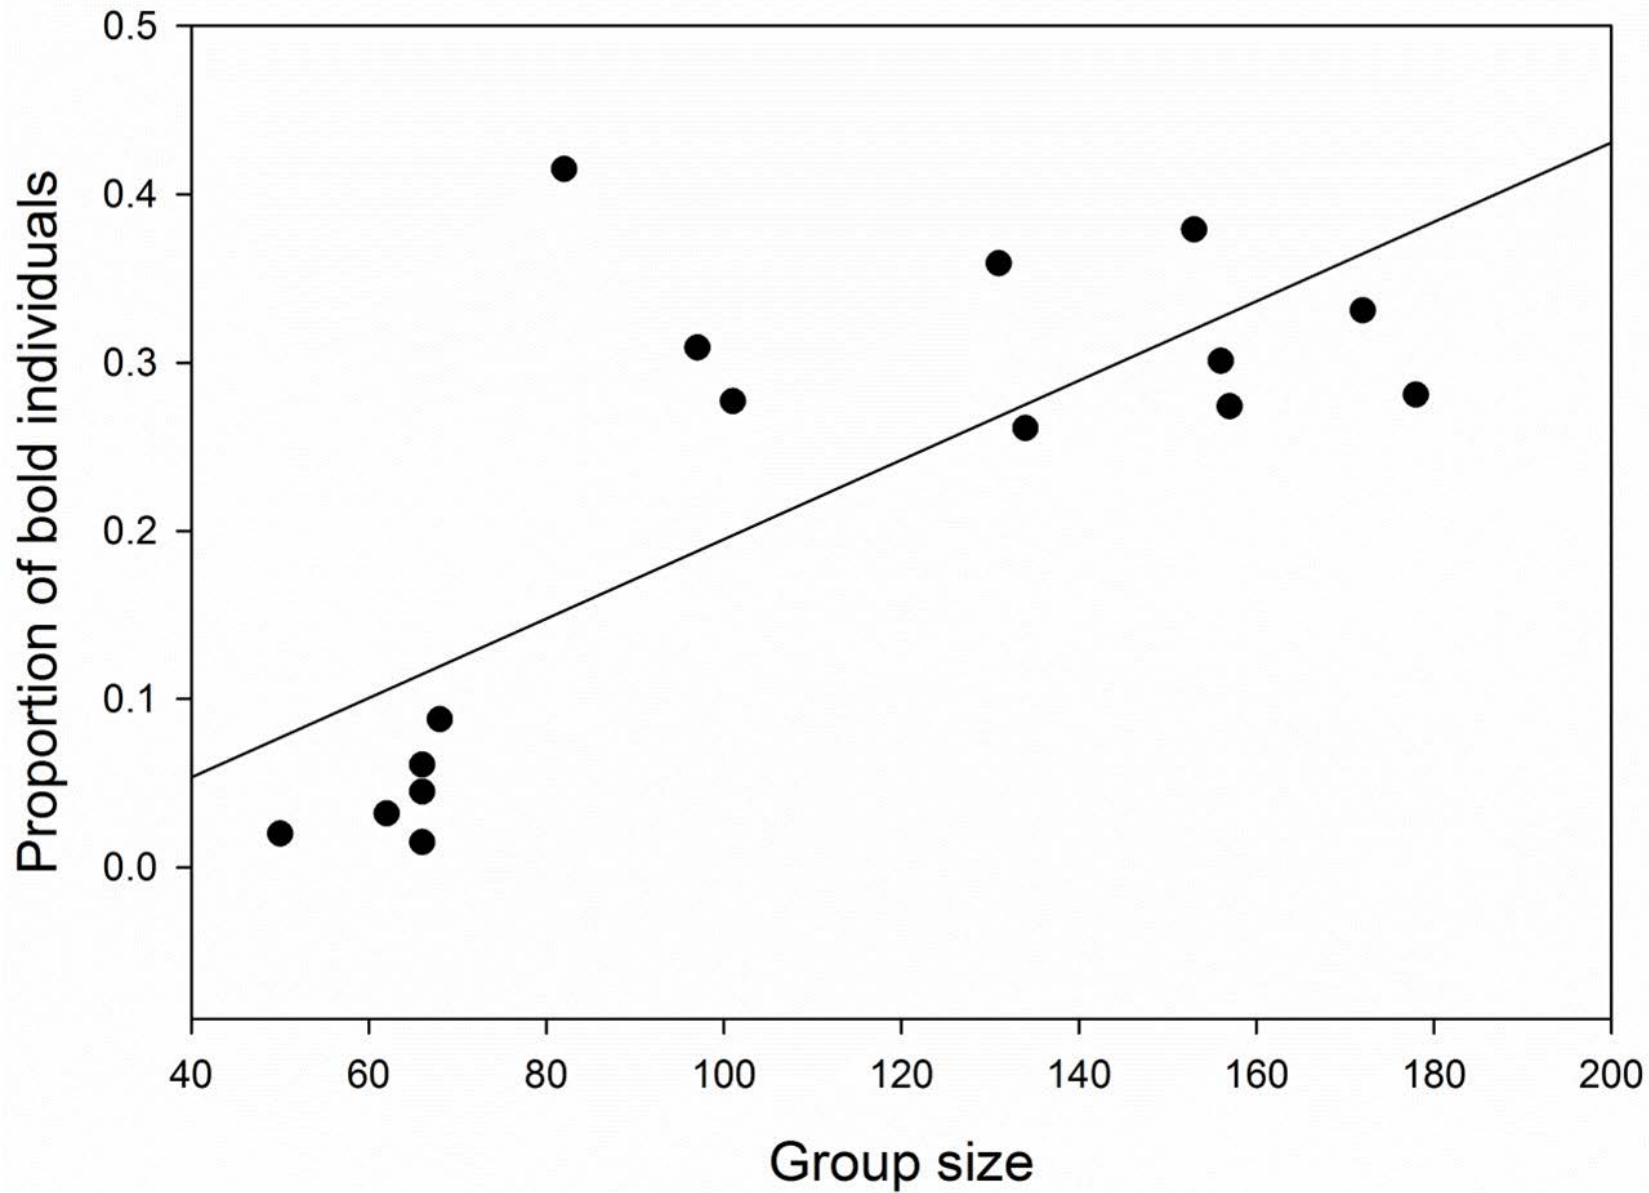

Supplement: rspb20141424supp2.pdf [file rspb20141424supp2.pdf]
